# Supplementary material for: From fibrous plant residues to mineral-associated organic carbon – the fate of organic matter in Arctic permafrost soils
Source: Copernicus journal article supplement (doi:10.5194/bg-2020-52), 2020-03-03

*Supplement of*

**From fibrous plant residues to mineral-associated organic carbon – the fate of organic matter in Arctic permafrost soils**

**Isabel Prater et al.**

*Correspondence to:* Isabel Prater (i.prater@tum.de)

**Table S1:** Basic properties of bulk soil samples and result of the fractionation: pH (measured in H<sub>2</sub>O), EC ( $\mu\text{S cm}^{-1}$ ), bulk density ( $\text{g cm}^{-3}$ ), C ( $\text{mg g}^{-1}$ ), N ( $\text{mg g}^{-1}$ ), C/N ratio and the distribution of SOM fractions ( $\text{mg g}^{-1}$ ) for the bulk soil samples of all analyzed depth layers. The particulate organic matter fractions are free (fPOM), occluded (oPOM) and small occluded (oPOMs) particulate organic matter.

| depth  | pH                 | EC                    | bulk density       | C                  | N                  | C/N ratio | distribution of SOM fractions |       |       |                                 |            |            |       |
|--------|--------------------|-----------------------|--------------------|--------------------|--------------------|-----------|-------------------------------|-------|-------|---------------------------------|------------|------------|-------|
|        |                    |                       |                    |                    |                    |           | particulate OM fractions      |       |       | mineral-associated OM fractions |            |            |       |
|        |                    |                       |                    |                    |                    |           | fPOM                          | oPOM  | oPOMs | clay-sized                      | silt-sized | sand-sized |       |
| cm     | (H <sub>2</sub> O) | $\mu\text{S cm}^{-1}$ | $\text{g cm}^{-3}$ | $\text{mg g}^{-1}$ | $\text{mg g}^{-1}$ |           | $\text{mg g}^{-1}$            |       |       |                                 |            |            |       |
| core 1 | 11-22              | 5.5                   | 69                 | 0.3                | 55.2               | 1.6       | 36                            | 107.6 | 5.9   | 4.4                             | 98.4       | 192.3      | 591.5 |
|        | 22-30              | 6.5                   | 153                | 0.3                | 61.9               | 2.2       | 29                            | 103.6 | 16.5  | 9.0                             | 141.6      | 294.2      | 435.1 |
|        | 30-40              | 6.2                   | 87                 | 0.4                | 32.9               | 1.4       | 24                            | 36.4  | 14.0  | 9.5                             | 113.5      | 257.6      | 568.9 |
|        | 40-50              | 6.0                   | 98                 | 0.3                | 48.9               | 1.5       | 33                            | 89.7  | 13.4  | 7.4                             | 138.3      | 286.5      | 464.6 |
|        | 50-62              | 5.4                   | 69                 | 0.6                | 47.5               | 1.9       | 25                            | 70.6  | 12.1  | 12.1                            | 134.5      | 243.9      | 527.8 |
|        | 62-75              | 5.3                   | 87                 | 0.4                | 60.3               | 2.4       | 25                            | 91.2  | 19.2  | 17.7                            | 181.7      | 311.8      | 378.4 |
| core 2 | 30-40              | 5.1                   | 117                | 0.4                | 95.8               | 2.8       | 34                            | 223.7 | 27.0  | 5.4                             | 171.7      | 314.8      | 257.4 |
|        | 40-50              | 5.1                   | 174                | 0.3                | 109.8              | 3.6       | 31                            | 260.6 | 20.8  | 13.1                            | 244.5      | 336.8      | 124.2 |
|        | 50-60              | 5.1                   | 240                | 0.2                | 144.0              | 3.8       | 38                            | 295.0 | 22.9  | 218.4                           | 122.5      | 247.2      | 94.1  |
|        | 60-70              | 4.9                   | 203                | 0.4                | 61.7               | 2.4       | 26                            | 99.2  | 57.8  | 267.2                           | 101.3      | 395.6      | 79.0  |
| core 3 | 11-20              | 6.6                   | 85                 | 0.5                | 45.8               | 1.3       | 37                            | 62.8  | 52.5  | 82.3                            | 37.2       | 182.4      | 582.8 |
|        | 20-30              | 6.1                   | 75                 | 0.9                | 31.6               | 1.3       | 25                            | 30.2  | 30.0  | 116.0                           | 43.7       | 255.1      | 525.0 |
|        | 40-50              | 5.8                   | 134                | 0.4                | 47.9               | 2.1       | 23                            | 169.6 | 20.5  | 176.4                           | 97.7       | 305.2      | 230.6 |
|        | 59-68              | 6.0                   | 76                 | 0.9                | 52.2               | 2.0       | 26                            | 115.6 | 11.1  | 125.4                           | 60.1       | 316.6      | 371.2 |
|        | 68-80              | 5.8                   | 124                | 0.4                | 135.7              | 4.3       | 32                            | 206.8 | 71.7  | 167.1                           | 124.8      | 301.6      | 128.1 |
| core 4 | 0-10               | 5.5                   | 76                 | 0.4                | 56.2               | 3.3       | 17                            | 155.5 | 6.6   | 18.2                            | 119.6      | 197.0      | 503.0 |
|        | 10-20              | 5.8                   | 66                 | 0.6                | 33.2               | 1.5       | 22                            | 75.7  | 3.0   | 3.9                             | 121.8      | 241.9      | 553.7 |
|        | 20-30              | 5.6                   | 82                 | 0.6                | 37.6               | 2.0       | 19                            | 50.2  | 8.9   | 12.7                            | 148.6      | 315.8      | 463.9 |
|        | 30-40              | 5.6                   | 125                | 0.4                | 77.8               | 3.1       | 25                            | 202.0 | 15.2  | 15.8                            | 176.8      | 265.5      | 324.7 |
|        | 40-50              | 6.0                   | 73                 | 0.9                | 33.5               | 2.2       | 15                            | 16.2  | 8.7   | 22.8                            | 163.5      | 366.1      | 422.8 |
|        | 50-60              | 5.7                   | 121                | 0.7                | 84.5               | 6.3       | 13                            | 10.6  | 34.3  | 111.7                           | 214.5      | 439.6      | 189.3 |
|        | 60-70              | 5.5                   | 161                | 0.3                | 85.5               | 6.3       | 14                            | 11.3  | 37.2  | 125.5                           | 216.7      | 467.0      | 142.2 |
|        | 70-79              | 5.6                   | 147                | 0.3                | 91.7               | 6.8       | 14                            | 13.7  | 30.2  | 133.0                           | 231.6      | 479.3      | 112.2 |

**Table S2:** Properties of SOM fractions: C per fraction (mg C (soil g)<sup>-1</sup>), N per fraction (mg N (soil g)<sup>-1</sup>), C/N ratio,  $\delta^{13}\text{C}$  (‰ V-PDB) and  $\delta^{15}\text{N}$  (‰ air N<sub>2</sub>) for free particulate (fPOM), occluded particulate (oPOM), small occluded particulate (oPOMs) and clay-sized mineral-associated organic matter (MAOM).

| depth  | cm    | fPOM                                          |                                               |                |                                  |                                               | oPOM                                          |                                               |                |                                  |                                               | oPOMs                                         |                                               |           |                                  |                                               | clay-sized MAOM                               |                                               |           |                                  |                                               |
|--------|-------|-----------------------------------------------|-----------------------------------------------|----------------|----------------------------------|-----------------------------------------------|-----------------------------------------------|-----------------------------------------------|----------------|----------------------------------|-----------------------------------------------|-----------------------------------------------|-----------------------------------------------|-----------|----------------------------------|-----------------------------------------------|-----------------------------------------------|-----------------------------------------------|-----------|----------------------------------|-----------------------------------------------|
|        |       | C per fraction<br>mg C (soil g) <sup>-1</sup> | N per fraction<br>mg N (soil g) <sup>-1</sup> | C/N ratio      | $\delta^{13}\text{C}$<br>‰ V-PDB | $\delta^{15}\text{N}$<br>‰ air N <sub>2</sub> | C per fraction<br>mg C (soil g) <sup>-1</sup> | N per fraction<br>mg N (soil g) <sup>-1</sup> | C/N ratio      | $\delta^{13}\text{C}$<br>‰ V-PDB | $\delta^{15}\text{N}$<br>‰ air N <sub>2</sub> | C per fraction<br>mg C (soil g) <sup>-1</sup> | N per fraction<br>mg N (soil g) <sup>-1</sup> | C/N ratio | $\delta^{13}\text{C}$<br>‰ V-PDB | $\delta^{15}\text{N}$<br>‰ air N <sub>2</sub> | C per fraction<br>mg C (soil g) <sup>-1</sup> | N per fraction<br>mg N (soil g) <sup>-1</sup> | C/N ratio | $\delta^{13}\text{C}$<br>‰ V-PDB | $\delta^{15}\text{N}$<br>‰ air N <sub>2</sub> |
| core 1 | 11-22 | 765.9                                         | 361.4                                         | 76             | -26.9                            | 1.4                                           | 41.2                                          | 28.6                                          | 52             | -26.2                            | 1.3                                           | 19.4                                          | 45.6                                          | 15        | -27.3                            | 1.0                                           | 147.2                                         | 453.4                                         | 12        | -27.0                            | 1.8                                           |
|        | 22-30 | 641.6                                         | 366.3                                         | 51             | -28.2                            | 0.7                                           | 108.3                                         | 56.4                                          | 55             | -27.8                            | 1.0                                           | 36.0                                          | 61.2                                          | 17        | -28.0                            | 0.9                                           | 188.8                                         | 428.7                                         | 13        | -28.1                            | 1.8                                           |
|        | 30-40 | 437.1                                         | 164.1                                         | 64             | -26.5                            | 0.9                                           | 174.1                                         | 61.9                                          | 68             | -26.4                            | 0.9                                           | 69.7                                          | 106.8                                         | 16        | -27.5                            | 0.8                                           | 270.3                                         | 534.2                                         | 12        | -27.2                            | 1.7                                           |
|        | 40-50 | 674.8                                         | 311.1                                         | 71             | -26.8                            | 0.9                                           | 106.7                                         | 51.5                                          | 67             | -25.8                            | 1.2                                           | 27.6                                          | 54.1                                          | 17        | -27.1                            | 1.0                                           | 152.2                                         | 445.9                                         | 11        | -27.2                            | 2.1                                           |
|        | 50-62 | 588.3                                         | 305.4                                         | 49             | -28.3                            | 0.8                                           | 105.6                                         | 42.2                                          | 64             | -28.0                            | 1.4                                           | 50.5                                          | 90.6                                          | 14        | -28.4                            | 1.1                                           | 222.2                                         | 470.2                                         | 12        | -28.5                            | -0.4                                          |
|        | 62-75 | 533.1                                         | 300.3                                         | 44             | -26.0                            | 1.0                                           | 134.6                                         | 56.1                                          | 60             | -25.3                            | 1.0                                           | 76.7                                          | 114.4                                         | 17        | -26.9                            | 1.1                                           | 218.4                                         | 438.0                                         | 13        | -26.9                            | 1.1                                           |
| core 2 | 30-40 | 780.3                                         | 508.2                                         | 53             | -26.8                            | 0.8                                           |                                               |                                               | <i>outlier</i> |                                  |                                               | 13.7                                          | 31.5                                          | 15        | -27.3                            | 0.9                                           | 118.0                                         | 358.2                                         | 11        | -27.8                            | 1.6                                           |
|        | 40-50 | 722.0                                         | 438.5                                         | 50             | -27.1                            | 0.9                                           | 71.7                                          | 35.0                                          | 63             | -26.5                            | 1.1                                           | 30.7                                          | 55.5                                          | 17        | -26.9                            | 0.7                                           | 158.2                                         | 424.3                                         | 11        | -27.5                            | 1.6                                           |
|        | 50-60 | 674.6                                         | 384.9                                         | 66             | -26.3                            | 1.0                                           | 58.5                                          | 40.1                                          | 55             | -26.4                            | 1.1                                           | 194.7                                         | 367.6                                         | 20        | -26.5                            | 1.8                                           | 64.4                                          | 176.0                                         | 14        | -26.0                            | 3.2                                           |
|        | 60-70 | 538.8                                         | 226.8                                         | 61             | -25.7                            | 0.7                                           |                                               |                                               | <i>outlier</i> |                                  |                                               | 265.7                                         | 514.4                                         | 13        | -26.6                            | 2.8                                           | 92.7                                          | 161.5                                         | 15        | -26.9                            | 3.4                                           |
| core 3 | 11-20 | 527.0                                         | 356.4                                         | 51             | -27.3                            | -0.3                                          |                                               |                                               | <i>outlier</i> |                                  |                                               | 222.9                                         | 341.7                                         | 22        | -26.0                            | 1.8                                           | 76.7                                          | 167.7                                         | 16        | -24.1                            | 2.9                                           |
|        | 20-30 | 373.9                                         | 229.3                                         | 41             | -26.9                            | 0.8                                           |                                               |                                               | <i>outlier</i> |                                  |                                               | 394.5                                         | 469.5                                         | 21        | -25.8                            | 2.3                                           | 99.1                                          | 175.8                                         | 14        | -25.5                            | 3.0                                           |
|        | 40-50 |                                               |                                               | <i>outlier</i> |                                  |                                               | 165.4                                         | 33.3                                          | 113            | -25.3                            | 0.7                                           | 427.7                                         | 387.5                                         | 25        | -25.0                            | 2.4                                           | 131.3                                         | 194.7                                         | 15        | -25.1                            | 2.3                                           |
|        | 59-68 | 608.3                                         | 463.1                                         | 35             | -25.8                            | 0.7                                           | 82.1                                          | 33.9                                          | 64             | -26.2                            | 0.7                                           | 216.3                                         | 293.9                                         | 19        | -25.6                            | 2.9                                           | 59.4                                          | 118.5                                         | 13        | -25.5                            | 3.1                                           |
|        | 68-80 | 499.3                                         | 283.3                                         | 56             | -25.6                            | 1.0                                           | 195.8                                         | 142.7                                         | 43             | -25.7                            | 1.3                                           | 228.1                                         | 386.5                                         | 19        | -25.6                            | 1.3                                           | 65.1                                          | 147.5                                         | 14        | -25.4                            | 2.3                                           |
| core 4 | 0-10  | 543.0                                         | 385.7                                         | 24             | -27.9                            | 0.4                                           | 50.6                                          | 23.7                                          | 37             | -26.9                            | 1.5                                           | 105.7                                         | 141.3                                         | 13        | -28.2                            | 0.2                                           | 250.7                                         | 371.2                                         | 12        | -27.7                            | 0.3                                           |
|        | 10-20 | 645.9                                         | 329.3                                         | 43             | -27.3                            | 1.2                                           | 34.5                                          | 18.2                                          | 42             | -27.0                            | 2.4                                           | 21.4                                          | 27.0                                          | 18        | -27.7                            | 1.3                                           | 249.3                                         | 480.9                                         | 12        | -28.0                            | 1.4                                           |
|        | 20-30 | 419.3                                         | 199.1                                         | 39             | -30.2                            | 1.3                                           | 102.1                                         | 54.2                                          | 35             | -30.4                            | 2.4                                           | 94.3                                          | 108.4                                         | 16        | -30.1                            | 1.5                                           | 311.7                                         | 506.3                                         | 11        | -30.4                            | 1.6                                           |
|        | 30-40 | 616.2                                         | 390.3                                         | 39             | -30.6                            | 0.2                                           | 81.9                                          | 35.1                                          | 58             | -30.4                            | 0.7                                           | 63.0                                          | 87.9                                          | 18        | -30.0                            | 0.6                                           | 208.3                                         | 416.6                                         | 13        | -29.7                            | 1.0                                           |
|        | 40-50 | 157.0                                         | 85.6                                          | 28             | -30.1                            | -0.2                                          | 114.3                                         | 60.0                                          | 29             | -30.6                            | 0.2                                           | 224.7                                         | 202.4                                         | 17        | -30.6                            | 0.3                                           | 431.4                                         | 522.9                                         | 12        | -31.2                            | 0.6                                           |
|        | 50-60 | 52.5                                          | 27.6                                          | 25             | -30.2                            | 0.3                                           | 178.3                                         | 127.6                                         | 19             | -30.1                            | 0.6                                           | 456.1                                         | 466.9                                         | 13        | -31.1                            | 0.1                                           | 275.0                                         | 319.1                                         | 12        | -31.3                            | 0.3                                           |
|        | 60-70 | 55.1                                          | 34.3                                          | 22             | -31.2                            | 0.0                                           | 190.1                                         | 140.4                                         | 18             | -30.5                            | 0.6                                           | 473.8                                         | 481.6                                         | 13        | -31.5                            | -0.0                                          | 223.7                                         | 263.7                                         | 12        | -31.8                            | 0.4                                           |
|        | 70-79 | 63.6                                          | 39.6                                          | 22             | -30.4                            | 0.5                                           | 147.9                                         | 104.3                                         | 19             | -30.0                            | 0.7                                           | 479.7                                         | 485.8                                         | 13        | -31.2                            | 0.2                                           | 249.2                                         | 289.96                                        | 11.7      | -31.6                            | 0.2                                           |

**Table S3:** Decomposition proxies obtained by <sup>13</sup>C CP-MAS NMR spectroscopy per depth layer for free particulate (fPOM), occluded particulate (oPOM), small occluded particulate (oPOMs) and clay-sized mineral-associated organic matter (MAOM).

| depth<br>cm | fPOM       |                   | oPOM           |                   | oPOMs          |                   | clay-sized MAOM |                   |           |
|-------------|------------|-------------------|----------------|-------------------|----------------|-------------------|-----------------|-------------------|-----------|
|             | a/oa ratio | 70-75/52-57 ratio | a/oa ratio     | 70-75/52-57 ratio | a/oa ratio     | 70-75/52-57 ratio | a/oa ratio      | 70-75/52-57 ratio |           |
| core 1      | 11-22      | 0.15              | 9.71           | 0.16              | 9.40           | 0.59              | 2.55            | 0.47              | 2.07      |
|             | 22-30      | 0.15              | 6.96           | 0.16              | 8.68           | 0.58              | 2.49            | 0.52              | 2.26      |
|             | 30-40      | 0.13              | 7.95           | 0.09              | 14.95          | 0.57              | 2.56            | 0.46              | 2.33      |
|             | 40-50      | 0.12              | 11.38          | 0.12              | 10.27          | 0.63              | 2.23            | 0.62              | 2.06      |
|             | 50-62      | 0.18              | 5.90           | 0.12              | 12.39          | 0.61              | 2.44            | 0.49              | 2.58      |
|             | 62-75      | 0.21              | 5.21           | 0.10              | 11.57          | 0.61              | 3.15            | 0.47              | 2.53      |
| core 2      | 30-40      | 0.18              | 5.80           |                   | <i>outlier</i> | 0.54              | 2.68            | <i>nd</i>         | <i>nd</i> |
|             | 40-50      | 0.17              | 5.87           | 0.10              | 8.79           | 0.47              | 2.81            | <i>nd</i>         | <i>nd</i> |
|             | 50-60      | 0.12              | 7.36           | 0.14              | 5.68           | 0.34              | 2.77            | <i>nd</i>         | <i>nd</i> |
|             | 60-70      | 0.16              | 4.87           |                   | <i>outlier</i> | 0.39              | 1.83            | <i>nd</i>         | <i>nd</i> |
| core 3      | 11-20      | 0.14              | 5.64           |                   | <i>outlier</i> | 0.25              | 3.07            | <i>nd</i>         | <i>nd</i> |
|             | 20-30      | 0.16              | 4.21           |                   | <i>outlier</i> | 0.26              | 2.65            | <i>nd</i>         | <i>nd</i> |
|             | 40-50      |                   | <i>outlier</i> | 0.08              | 8.58           | 0.19              | 3.20            | 0.40              | 1.88      |
|             | 59-68      | 0.25              | 3.80           | 0.09              | 5.81           | 0.28              | 2.77            | <i>nd</i>         | <i>nd</i> |
|             | 68-80      | 0.13              | 5.46           | 0.16              | 4.02           | 0.38              | 2.80            | <i>nd</i>         | <i>nd</i> |
| core 4      | 0-10       | 0.21              | 4.18           | 0.22              | 6.48           | 0.50              | 2.70            | 0.43              | 2.17      |
|             | 10-20      | 0.08              | 5.27           | 0.21              | 4.28           | 0.67              | 2.42            | 0.47              | 1.71      |
|             | 20-30      | 0.11              | 5.17           | 0.30              | 4.36           | 0.68              | 2.27            | <i>nd</i>         | <i>nd</i> |
|             | 30-40      | 0.16              | 4.88           | 0.09              | 9.38           | 0.48              | 3.15            | <i>nd</i>         | <i>nd</i> |
|             | 40-50      | 0.34              | 3.16           | 0.29              | 4.64           | 0.75              | 2.12            | 0.53              | 1.85      |
|             | 50-60      | 0.32              | 3.75           | 0.39              | 3.79           | 0.55              | 2.50            | <i>nd</i>         | <i>nd</i> |
|             | 60-70      | 0.57              | 2.21           | 0.41              | 3.63           | 0.58              | 2.52            | <i>nd</i>         | <i>nd</i> |
|             | 70-79      | 0.38              | 4.34           | 0.42              | 3.83           | 0.55              | 2.65            | <i>nd</i>         | <i>nd</i> |

Figure S1: Exemplary  $^{13}\text{C}$  CP-MAS NMR spectra of fPOM, oPOM, oPOMs and clay-sized MAOM fraction of one depth layer.

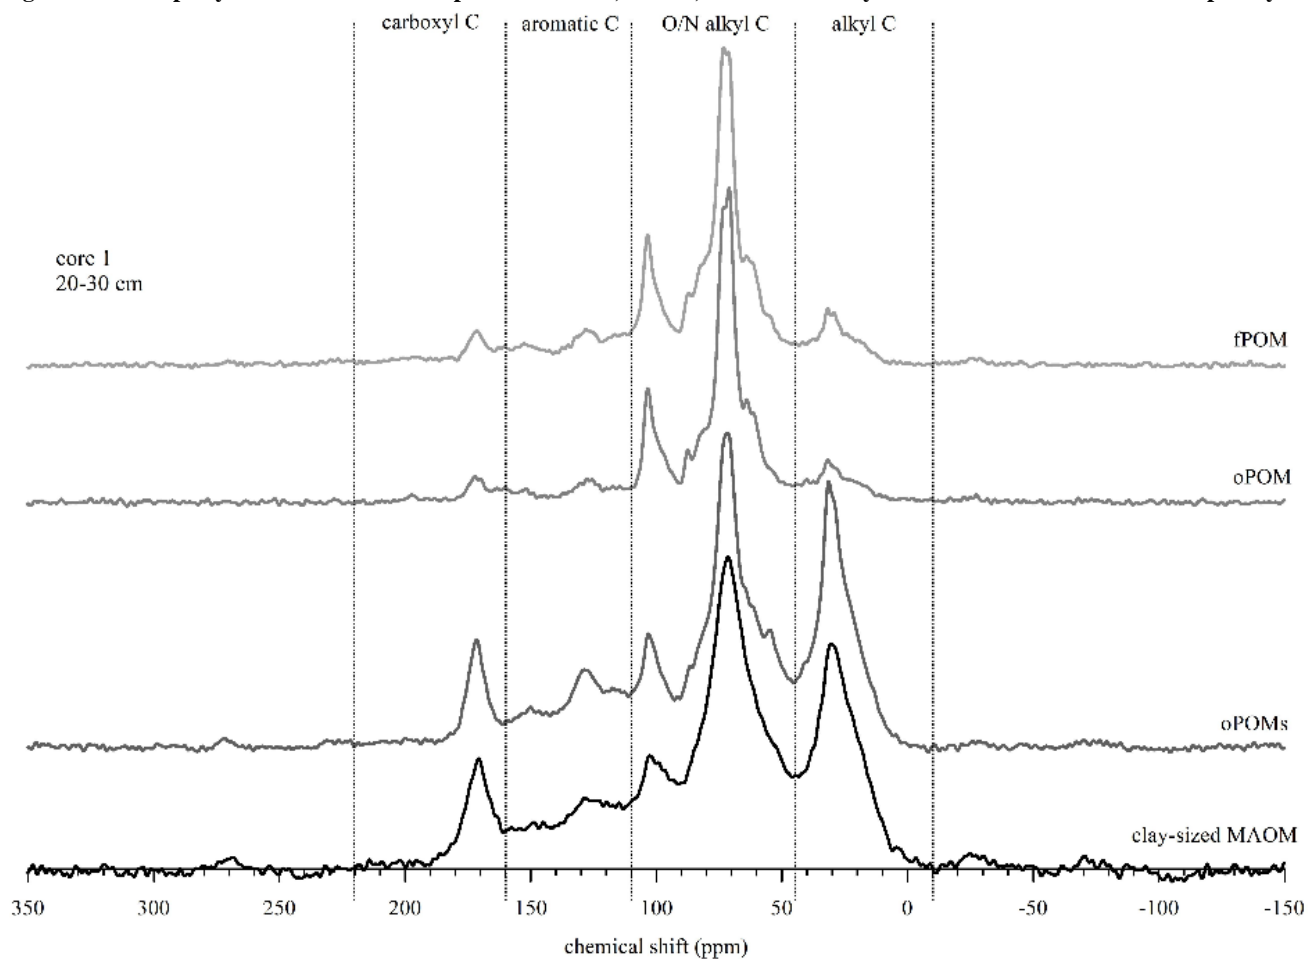

Supplement: Supplementary file [file bg-2020-52-AC4-supplement.pdf]
